# Supplementary material
Source: Springer Nature journal article supplement (https://www.springermedizin.de/resource/supplementary/12936_2013_3025_MOESM2_ESM.pdf/9544848)
Supplement: MOESM2 [file 9544848]

Additional file 2: Genotypic and allelic frequencies and association tests.

A: bendiocarb; *An. gambiae s.s.*

| Locality    | Dead |    |     | Live |    |    | Sample size |
|-------------|------|----|-----|------|----|----|-------------|
|             | SS   | GS | GG  | SS   | GS | GG |             |
| Huni Valley | 1    | 3  | 22  | 0    | 1  | 0  | 27          |
| Tarkwa      | 0    | 0  | 1   | 0    | 0  | 0  | 1           |
| Axim        | 0    | 8  | 14  | 0    | 1  | 0  | 23          |
| Takoradi    | 0    | 0  | 0   | 0    | 0  | 0  | 0           |
| Shama       | 0    | 1  | 0   | 0    | 0  | 0  | 1           |
| Komenda     | 0    | 0  | 2   | 0    | 0  | 0  | 2           |
| Cape Coast  | 0    | 0  | 0   | 0    | 0  | 0  | 0           |
| Twifo Praso | 0    | 4  | 27  | 0    | 0  | 1  | 32          |
| Assin Faso  | 0    | 6  | 31  | 0    | 2  | 1  | 40          |
| Swedru      | 0    | 2  | 11  | 0    | 4  | 0  | 17          |
| Madina      | 0    | 1  | 10  | 4    | 8  | 0  | 23          |
| Ashaiman    | 2    | 1  | 0   | 8    | 1  | 0  | 12          |
| Dodowa      | 0    | 4  | 7   | 1    | 12 | 0  | 24          |
| Koforidua   | 0    | 2  | 9   | 3    | 8  | 1  | 23          |
| Akim Oda    | 0    | 1  | 17  | 0    | 5  | 0  | 23          |
| Somanya     | 0    | 0  | 0   | 0    | 0  | 0  | 0           |
| Akatsi      | 0    | 3  | 15  | 0    | 4  | 0  | 22          |
| Keta        | 0    | 0  | 0   | 0    | 0  | 0  | 0           |
| Total       | 3    | 36 | 166 | 16   | 46 | 3  | 270         |

**Genotypic chi-square test for bendiocarb *An. gambiae s.s.***

|             | SS        | GS        | GG         |
|-------------|-----------|-----------|------------|
| <b>Dead</b> | <b>3</b>  | <b>36</b> | <b>166</b> |
| <b>Live</b> | <b>16</b> | <b>46</b> | <b>3</b>   |

$$X^2 = 129.57, df = 2, P < 0.0001$$

**Allelic chi-square test for bendiocarb *An. gambiae s.s.***

|             | S         | G          |
|-------------|-----------|------------|
| <b>Dead</b> | <b>42</b> | <b>368</b> |
| <b>Live</b> | <b>78</b> | <b>52</b>  |

$$X^2 = 141.38, df = 1, P < 0.0001$$

Odds ratio (OR) = 13.14 (95% C.I. 8.18-21.21)

B: bendiocarb; *An. coluzzii*

| Locality     | Dead     |           | Live       |          |          | Sample size |            |
|--------------|----------|-----------|------------|----------|----------|-------------|------------|
|              | SS       | GS        | SS         | SS       | GS       |             | GG         |
| Huni Valley  | 0        | 0         | 29         | 0        | 0        | 0           | 29         |
| Tarkwa       | 0        | 0         | 23         | 0        | 0        | 0           | 23         |
| Axim         | 0        | 0         | 1          | 0        | 0        | 0           | 1          |
| Takoradi     | 0        | 1         | 20         | 0        | 0        | 3           | 24         |
| Shama        | 0        | 1         | 22         | 0        | 0        | 0           | 23         |
| Komenda      | 0        | 0         | 21         | 0        | 0        | 1           | 22         |
| Cape Coast   | 0        | 0         | 15         | 0        | 3        | 6           | 24         |
| Twifo Praso  | 0        | 0         | 22         | 0        | 0        | 2           | 24         |
| Assin Faso   | 0        | 2         | 14         | 0        | 0        | 0           | 16         |
| Swedru       | 0        | 0         | 7          | 0        | 0        | 0           | 7          |
| Madina       | 0        | 0         | 1          | 0        | 0        | 0           | 1          |
| Ashiaman     | 0        | 6         | 3          | 1        | 2        | 0           | 12         |
| Dodowa       | 0        | 0         | 0          | 0        | 0        | 0           | 0          |
| Koforidua    | 0        | 1         | 0          | 0        | 0        | 0           | 1          |
| Akim Oda     | 0        | 1         | 23         | 0        | 0        | 1           | 25         |
| Akatsi       | 0        | 0         | 2          | 0        | 0        | 0           | 2          |
| Keta         | 0        | 0         | 32         | 0        | 3        | 1           | 36         |
| <b>Total</b> | <b>0</b> | <b>12</b> | <b>235</b> | <b>1</b> | <b>8</b> | <b>14</b>   | <b>270</b> |

**Genotypic chi-square test for bendiocarb *An. coluzzii***

|             | SS       | GS        | GG         |
|-------------|----------|-----------|------------|
| <b>Dead</b> | <b>0</b> | <b>12</b> | <b>235</b> |
| <b>Live</b> | <b>1</b> | <b>8</b>  | <b>14</b>  |

$X^2 = 38.86$ ,  $df = 2$ ,  $P < 0.0001$

**Allelic chi-square test for bendiocarb *An. coluzzii***

|             | S         | G          |
|-------------|-----------|------------|
| <b>Dead</b> | <b>12</b> | <b>482</b> |
| <b>Live</b> | <b>10</b> | <b>36</b>  |

$X^2 = 35.36$ ,  $df = 1$ ,  $P < 0.0001$

OR (95% C.I.)= 11.16 (4.51-27.58)

C: fenitrothion; *An. gambiae s.s.*

| Locality    | Dead |    |    | Live |    |    | Sample size |
|-------------|------|----|----|------|----|----|-------------|
|             | SS   | GS | GG | SS   | GS | GG |             |
| Tarkwa      | 0    | 0  | 1  | 0    | 0  | 0  | 1           |
| Twifo Praso | 1    | 2  | 15 | 0    | 0  | 0  | 18          |
| Assin Faso  | 0    | 2  | 13 | 0    | 0  | 0  | 15          |
| Swedru      | 0    | 2  | 33 | 0    | 3  | 0  | 38          |
| Ashiaman    | 0    | 2  | 0  | 13   | 0  | 0  | 15          |
| Dodowa      | 0    | 3  | 3  | 2    | 13 | 0  | 21          |
| Somanya     | 3    | 5  | 14 | 0    | 0  | 0  | 22          |
| Akatsi      | 0    | 4  | 16 | 0    | 0  | 0  | 20          |
| Total       | 4    | 20 | 95 | 15   | 16 | 0  | 150         |

**Genotypic chi-square test for fenitrothion *An. gambiae s.s.***

|             | SS        | GS        | GG        |
|-------------|-----------|-----------|-----------|
| <b>Dead</b> | <b>4</b>  | <b>20</b> | <b>95</b> |
| <b>Live</b> | <b>15</b> | <b>16</b> | <b>0</b>  |

$X^2 = 76.52$ ,  $df = 2$ ,  $P < 0.0001$

**Allelic chi-square test for fenitrothion *An. gambiae s.s.***

|             | S         | G          |
|-------------|-----------|------------|
| <b>Dead</b> | <b>28</b> | <b>210</b> |
| <b>Live</b> | <b>46</b> | <b>16</b>  |

$X^2 = 103.16$ ,  $df = 1$ ,  $P < 0.0001$

OR (95% C.I.) = 21.56 (10.79-43.08)

**D: fenitrothion; *An. coluzzii***

| Locality    | Dead |    |    | Live |    |    | Sample size |
|-------------|------|----|----|------|----|----|-------------|
|             | SS   | GS | GG | SS   | GS | GG |             |
| Tarkwa      | 0    | 0  | 23 | 0    | 0  | 0  | 23          |
| Takoradi    | 0    | 0  | 24 | 0    | 0  | 0  | 24          |
| Twifo Praso | 0    | 0  | 6  | 0    | 0  | 0  | 6           |
| Assin Faso  | 0    | 0  | 9  | 0    | 0  | 0  | 9           |
| Swedru      | 0    | 0  | 17 | 0    | 0  | 0  | 17          |
| Ashiaman    | 0    | 2  | 4  | 0    | 3  | 0  | 9           |
| Dodowa      | 0    | 1  | 1  | 0    | 1  | 0  | 3           |
| Somanya     | 0    | 2  | 0  | 0    | 0  | 0  | 2           |
| Akatsi      | 0    | 1  | 3  | 0    | 0  | 0  | 4           |
| Total       | 0    | 6  | 87 | 0    | 4  | 0  | 97          |

**Genotypic test for fenitrothion *An. coluzzii***

|             | SS       | GS       | GG        |
|-------------|----------|----------|-----------|
| <b>Dead</b> | <b>0</b> | <b>6</b> | <b>87</b> |
| <b>Live</b> | <b>0</b> | <b>4</b> | <b>0</b>  |

P < 0.0001, fisher exact test used owing to low expected frequencies  
(<http://www.vassarstats.net/fisher2x3.html>)

**Allelic chi-square test for fenitrothion *An. coluzzii***

|             | S        | G          |
|-------------|----------|------------|
| <b>Dead</b> | <b>6</b> | <b>180</b> |
| <b>Live</b> | <b>4</b> | <b>5</b>   |

$\chi^2 = 22.10$ ,  $df = 1$ ,  $P < 0.0001$

OR (95% C.I.) = 30.0 (6.02-149.63)
